# Supplementary material
Source: PubMed Central journal article supplement (PMC8800560)

## SUPPLEMENTAL MATERIAL

**Supplement Table 1.** COMBINE AF Investigators.

| <b>EXECUTIVE COMMITTEE</b>                  |                                                                                    |
|---------------------------------------------|------------------------------------------------------------------------------------|
| Christopher B Granger, MD                   | Duke Clinical Research Institute, Duke University, Durham, NC                      |
| Manesh R Patel, MD                          | Duke Clinical Research Institute, Duke University, Durham, NC                      |
| Stuart J Connolly, MD                       | Population Health Research Institute, McMaster University, Ontario, Canada         |
| John Eikelboom, MBBS, MSc                   | Population Health Research Institute, McMaster University, Ontario, Canada         |
| Robert P Giugliano, MD, SM                  | TIMI Study Group, Brigham and Women's Hospital, Harvard Medical School, Boston, MA |
| Lars Wallentin, MD, PhD                     | Uppsala Clinical Research Center, Uppsala University, Uppsala, Sweden              |
| <b>BIOMARKER SUB-COMMITTEE CO-CHAIRS</b>    |                                                                                    |
| Lars Wallentin, MD, PhD                     | Uppsala Clinical Research Center, Uppsala University, Uppsala, Sweden              |
| David A Morrow, MD, MPH                     | TIMI Study Group, Brigham and Women's Hospital, Harvard Medical School, Boston, MA |
| <b>STEERING COMMITTEE</b>                   |                                                                                    |
| <b>Duke Clinical Research Institute</b>     |                                                                                    |
| John H Alexander, MD, MHS                   | Renato D Lopes, MD, PhD                                                            |
| Anthony P Carnicelli, MD                    | Manesh R Patel, MD                                                                 |
| Christopher B Granger, MD                   | Jonathan P Piccini, MD, MHS                                                        |
| Hwanhee Hong, PhD                           | Daniel Wojdyla, MSc                                                                |
| Kaiyuan Hua, MB                             |                                                                                    |
| <b>TIMI Study Group</b>                     |                                                                                    |
| Erin A Bohula, MD, DPhil                    | David A Morrow, MD, MPH                                                            |
| Robert P Giugliano, MD, SM                  | Sabina Murphy, MPH                                                                 |
| Julia Kuder, MA                             | Christian Ruff, MD, MPH                                                            |
| <b>Population Health Research Institute</b> |                                                                                    |
| Alexander P Benz, MD, MSc                   | Leanne Dyal, MSc                                                                   |
| Stuart J Connolly, MD                       | John Eikelboom, MBBS, MSc                                                          |
| <b>Uppsala Clinical Research Center</b>     |                                                                                    |
| Julia Aulin, PhD                            | Jonas Oldgren, MD, PhD                                                             |
| Ziad Hijazi, MD, PhD                        | Lars Wallentin, MD, PhD                                                            |
| Johan Lindbäck, MSc                         |                                                                                    |
| <b>Mount Sinai Medical Center</b>           |                                                                                    |
| Jonathan Halperin, MD                       |                                                                                    |
| <b>University Heart Center Zurich</b>       |                                                                                    |
| Jan Steffel, MD                             |                                                                                    |
| <b>Taipei Veterans General Hospital</b>     |                                                                                    |
| Tze-Fan Chao, MD, PhD                       |                                                                                    |
| <b>Kyoto University Hospital</b>            |                                                                                    |

|                                                |                     |
|------------------------------------------------|---------------------|
| Eri Toda Kato, MD, PhD                         |                     |
|                                                |                     |
| <b>University of Edinburgh</b>                 |                     |
| Keith AA Fox, MD                               |                     |
|                                                |                     |
| <b>INECO Neurociencias Oroño</b>               |                     |
| M Cecilia Bahit, MD                            |                     |
|                                                |                     |
| <b>Boston University School of Medicine</b>    |                     |
| Elaine Hylek, MD, MPH                          |                     |
|                                                |                     |
| <b>Lankenau Institute for Medical Research</b> |                     |
| Michael Ezekowitz, MB, ChB, DPhil              |                     |
|                                                |                     |
| <b>Stanford University</b>                     |                     |
| Kenneth Mahaffey, MD                           |                     |
|                                                |                     |
| <b>J.W. Goethe University</b>                  |                     |
| Stefan H Hohnloser, MD                         |                     |
|                                                |                     |
| <b>Geneva University Hospital</b>              |                     |
| Baris Gencer, MD                               |                     |
|                                                |                     |
| <b>Bayer AG</b>                                |                     |
| Scott D Berkowitz, MD                          |                     |
|                                                |                     |
| <b>Boehringer Ingelheim</b>                    |                     |
| Jutta Heinrich-Nols, MD                        | Joanne van Ryn, PhD |
| Eva Kleine, MSc                                |                     |
|                                                |                     |
| <b>Bristol Myers Squibb</b>                    |                     |
| Christian Klem, PharmD                         |                     |
|                                                |                     |
| <b>Daiichi Sankyo</b>                          |                     |
| Cathy Chen, MD                                 | Hans Lanz, MD       |
|                                                |                     |
| <b>Janssen</b>                                 |                     |
| JoAnne Foody, MD                               |                     |
|                                                |                     |
| <b>Pfizer</b>                                  |                     |
| Christina Russ, MD                             |                     |

**Supplement Table 2.** Number (%) of patients who remained at risk (i.e. remained alive and active in a given trial) for 71,683 patients at 6-month intervals by individual trial.

|                                                                                                                                                                                                                      | 0 months |       | 6 months |      | 12 months |      | 18 months |      | 24 months |      | 30 months |      | 36 months |      | 42 months |     | 48 months |     |
|----------------------------------------------------------------------------------------------------------------------------------------------------------------------------------------------------------------------|----------|-------|----------|------|-----------|------|-----------|------|-----------|------|-----------|------|-----------|------|-----------|-----|-----------|-----|
|                                                                                                                                                                                                                      | n        | %     | n        | %    | n         | %    | n         | %    | n         | %    | n         | %    | n         | %    | n         | %   | n         | %   |
| RE-LY<br>N=18113                                                                                                                                                                                                     | 18113    | 100.0 | 17764    | 98.1 | 17379     | 95.9 | 14063     | 77.6 | 8950      | 49.4 | 4212      | 23.3 | 97        | 0.5  | 0         | 0.0 | 0         | 0.0 |
| ROCKET AF<br>N=14264                                                                                                                                                                                                 | 14264    | 100.0 | 13734    | 96.3 | 13130     | 92.0 | 9603      | 67.3 | 5843      | 41.0 | 2472      | 17.3 | 208       | 1.5  | 0         | 0.0 | 0         | 0.0 |
| ARISTOTLE<br>N=18201                                                                                                                                                                                                 | 18201    | 100.0 | 17474    | 96.0 | 16943     | 93.1 | 12216     | 67.1 | 7002      | 38.5 | 3596      | 19.8 | 1203      | 6.6  | 245       | 1.3 | 5         | 0.0 |
| ENGAGE<br>AF-TIMI 48<br>N=21105                                                                                                                                                                                      | 21105    | 100.0 | 20666    | 97.9 | 20254     | 96.0 | 19827     | 93.9 | 19342     | 91.6 | 14348     | 68.0 | 7384      | 35.0 | 1688      | 8.0 | 95        | 0.5 |
| The exact point (in months) at which each trial dropped below 10% of patients at risk is as follows: 32.2 months for RE-LY, 31.9 months for ROCKET AF, 34.2 months for ARISTOTLE, 41.5 months for ENGAGE AF-TIMI 48. |          |       |          |      |           |      |           |      |           |      |           |      |           |      |           |     |           |     |

**Supplement Table 3.** Hazard ratios comparing standard-dose DOAC versus lower-dose DOAC strategies for efficacy and safety outcomes as well as the net clinical benefit. A hazard ratio > 1 favors lower-dose DOAC over standard-dose DOAC, whereas a hazard ratio < 1 favors standard-dose DOAC over lower-dose DOAC.

|                                          | <b>Standard-dose DOAC versus lower-dose DOAC</b> |
|------------------------------------------|--------------------------------------------------|
| <b>Efficacy Outcomes</b>                 | Hazard Ratio (95% Confidence Interval)           |
| Stroke or systemic embolism              | 0.76 (0.68-0.86)                                 |
| All-cause death                          | 1.02 (0.95-1.11)                                 |
| Cardiovascular death                     | 0.99 (0.90-1.10)                                 |
| Any stroke                               | 0.77 (0.68-0.87)                                 |
| Ischemic stroke                          | 0.71 (0.62-0.81)                                 |
| Systemic embolism                        | 0.68 (0.44-1.05)                                 |
| Efficacy composite                       | 0.89 (0.82-0.96)                                 |
| <b>Safety Outcomes</b>                   |                                                  |
| Major bleeding                           | 1.37 (0.95-1.96)                                 |
| Fatal bleeding                           | 1.44 (0.97-2.15)                                 |
| Major or NMCR bleeding                   | 1.25 (1.00-1.55)                                 |
| Any bleeding                             | 1.18 (0.98-1.43)                                 |
| Intracranial bleeding                    | 1.64 (1.17-2.30)                                 |
| Hemorrhagic stroke                       | 1.51 (1.04-2.18)                                 |
| Gastrointestinal bleeding                | 1.53 (1.07-2.17)                                 |
| <b>Net Clinical Benefit</b>              |                                                  |
| Stroke, SE, death, MB                    | 1.07 (0.94-1.23)                                 |
| Stroke, SE, death, intracranial bleeding | 0.88 (0.81-0.97)                                 |

MB = major bleeding, NMCR = non-major clinical relevant, DOAC = direct oral anticoagulant, SE = systemic embolism

The efficacy composite outcome consists of ischemic stroke, systemic embolism, or cardiovascular death.

**Supplement Table 4.** Hazard ratios and the associated standard errors (s.e.) comparing standard-dose DOAC versus warfarin and lower-dose DOAC versus warfarin for efficacy and safety outcomes as well as the net clinical benefit under fixed effect and random effects stratified Cox models. Estimated between-study heterogeneity measures ( $\hat{\tau}$ ) under the random effects models are reported. A hazard ratio > 1 favors lower-dose DOAC over standard-dose DOAC, whereas a hazard ratio < 1 favors standard-dose DOAC over lower-dose DOAC.

|                                          | Standard-dose DOAC versus warfarin |                          |              | Lower-dose DOAC versus warfarin |                     |              |
|------------------------------------------|------------------------------------|--------------------------|--------------|---------------------------------|---------------------|--------------|
|                                          | Fixed effect Cox model             | Random effects Cox model |              | Fixed effect model              | Random effect model |              |
|                                          | HR (s.e.)                          | HR (s.e.)                | $\hat{\tau}$ | HR (s.e.)                       | HR (s.e.)           | $\hat{\tau}$ |
| <b>Efficacy Outcomes</b>                 |                                    |                          |              |                                 |                     |              |
| Stroke or systemic embolism              | 0.81 (0.04)                        | 0.81 (0.04)              | 0.00         | 1.06 (0.06)                     | 1.06 (0.06)         | 0.00         |
| All-cause death                          | 0.92 (0.03)                        | 0.92 (0.03)              | 0.00         | 0.90 (0.04)                     | 0.90 (0.04)         | 0.00         |
| Cardiovascular death                     | 0.89 (0.03)                        | 0.89 (0.03)              | 0.00         | 0.90 (0.04)                     | 0.90 (0.04)         | 0.00         |
| Any stroke                               | 0.82 (0.04)                        | 0.82 (0.04)              | 0.01         | 1.07 (0.06)                     | 1.07 (0.06)         | 0.00         |
| Ischemic stroke                          | 0.95 (0.05)                        | 0.95 (0.05)              | 0.00         | 1.35 (0.09)                     | 1.35 (0.09)         | 0.00         |
| Systemic embolism                        | 0.71 (0.12)                        | 0.71 (0.12)              | 0.01         | 1.06 (0.22)                     | 1.05 (0.22)         | 0.05         |
| Efficacy composite                       | 0.90 (0.03)                        | 0.90 (0.03)              | 0.00         | 1.02 (0.04)                     | 1.02 (0.04)         | 0.00         |
|                                          |                                    |                          |              |                                 |                     |              |
| <b>Safety Outcomes</b>                   |                                    |                          |              |                                 |                     |              |
| Major bleeding                           | 0.86 (0.03)                        | 0.86 (0.07)              | 0.14         | 0.62 (0.03)                     | 0.63 (0.11)         | 0.23         |
| Fatal bleeding                           | 0.60 (0.08)                        | 0.60 (0.08)              | 0.00         | 0.42 (0.08)                     | 0.42 (0.08)         | 0.01         |
| Major or NMCR bleeding                   | 0.89 (0.02)                        | 0.87 (0.07)              | 0.15         | 0.66 (0.02)                     | 0.70 (0.06)         | 0.10         |
| Any bleeding                             | 0.88 (0.01)                        | 0.86 (0.07)              | 0.15         | 0.73 (0.02)                     | 0.73 (0.04)         | 0.08         |
| Intracranial bleeding                    | 0.45 (0.04)                        | 0.45 (0.05)              | 0.12         | 0.28 (0.04)                     | 0.28 (0.04)         | 0.01         |
| Hemorrhagic stroke                       | 0.49 (0.05)                        | 0.49 (0.05)              | 0.01         | 0.33 (0.06)                     | 0.33 (0.06)         | 0.00         |
| Gastrointestinal bleeding                | 1.33 (0.07)                        | 1.31 (0.12)              | 0.15         | 0.85 (0.07)                     | 0.85 (0.14)         | 0.20         |
|                                          |                                    |                          |              |                                 |                     |              |
| <b>Net Clinical Benefit</b>              |                                    |                          |              |                                 |                     |              |
| Stroke, SE, death, MB                    | 0.89 (0.02)                        | 0.89 (0.03)              | 0.03         | 0.83 (0.03)                     | 0.83 (0.05)         | 0.08         |
| Stroke, SE, death, intracranial bleeding | 0.82 (0.03)                        | 0.82 (0.03)              | 0.00         | 0.92 (0.04)                     | 0.92 (0.04)         | 0.00         |

DOAC = non-vitamin K antagonist oral anticoagulant, MB = major bleeding, NMCR = non-major clinical relevant, SE = systemic embolism

The efficacy composite outcome consists of ischemic stroke, systemic embolism, or cardiovascular death.

**Supplement Table 5.** Hazard ratios with 95% confidence intervals for the primary efficacy and primary safety endpoints from each individual trial, for standard-dose DOAC vs warfarin.

|                          | RELY                        | ROCKET AF                  | ARISTOTLE                   | ENGAGE AF-TIMI 48           |
|--------------------------|-----------------------------|----------------------------|-----------------------------|-----------------------------|
| Stroke/Systemic embolism | 0.64 (0.52-0.80)<br>P<0.001 | 0.87 (0.74-1.02)<br>P=0.09 | 0.79 (0.66-0.95)<br>P=0.01  | 0.87 (0.74-1.03)<br>P=0.11  |
| Major bleeding           | 0.98 (0.85-1.13)<br>P=0.81  | 1.04 (0.90-1.20)<br>P=0.61 | 0.69 (0.59-0.79)<br>P<0.001 | 0.80 (0.70-0.91)<br>P<0.001 |

**Supplement Table 6.** Hazard ratios (95% confidence intervals) and interaction p-values for the primary efficacy outcome (stroke or systemic embolism) comparing lower-dose DOAC versus warfarin by categorical baseline covariates. A hazard ratio > 1 favors warfarin over DOAC, whereas a hazard ratio < 1 favors DOAC over warfarin.

|                                |        | Lower-dose DOAC versus warfarin |       |
|--------------------------------|--------|---------------------------------|-------|
| Categorical Baseline Covariate |        | HR (95% CI)                     | P-int |
| Sex                            | Female | 1.05 (0.89-1.24)                | 0.87  |
|                                | Male   | 1.07 (0.92-1.23)                |       |
| Diabetes                       | Yes    | 1.03 (0.84-1.26)                | 0.74  |
|                                | No     | 1.07 (0.94-1.23)                |       |
| Prior stroke/TIA               | Yes    | 1.03 (0.86-1.23)                | 0.70  |
|                                | No     | 1.08 (0.93-1.24)                |       |
| Prior VKA use                  | Yes    | 1.18 (1.03-1.34)                | 0.01  |
|                                | No     | 0.86 (0.71-1.04)                |       |
| Antiplatelet use               | Yes    | 0.95 (0.79-1.13)                | 0.11  |
|                                | No     | 1.13 (0.98-1.30)                |       |
| CHADS <sub>2</sub> Score       | ≥3     | 0.98 (0.85-1.14)                | 0.23  |
|                                | 2      | 1.19 (0.98-1.44)                |       |
|                                | 0, 1   | 1.18 (0.81-1.72)                |       |
| Paroxysmal AF                  | Yes    | 0.97 (0.77-1.22)                | 0.36  |
|                                | No     | 1.09 (0.96-1.24)                |       |
| Coronary artery disease        | Yes    | 1.12 (0.93-1.35)                | 0.47  |
|                                | No     | 1.03 (0.90-1.18)                |       |
| Heart failure                  | Yes    | 1.11 (0.94-1.31)                | 0.43  |
|                                | No     | 1.02 (0.87-1.19)                |       |
| Prior GI bleeding              | Yes    | 1.83 (1.03-3.28)                | 0.09  |
|                                | No     | 1.10 (0.95-1.27)                |       |
| Age (years)                    | >75    | 1.04 (0.89-1.22)                | 0.03  |
|                                | 65-75  | 0.95 (0.79-1.14)                |       |
|                                | <65    | 1.41 (1.10-1.81)                |       |
| Weight (kg)                    | >120   | 1.08 (0.56-2.07)                | 0.90  |
|                                | 60-120 | 1.07 (0.95-1.22)                |       |
|                                | <60    | 1.00 (0.76-1.32)                |       |
| CrCl (mL/min)                  | >80    | 1.15 (0.93-1.42)                | 0.64  |
|                                | 51-80  | 1.01 (0.87-1.19)                |       |
|                                | ≤50    | 1.07 (0.88-1.31)                |       |

AF = atrial fibrillation, CrCl = creatinine clearance, GI = gastrointestinal, TIA = transient ischemic attack

**Supplement Table 7.** Sample size and event rates (% per year) by categorical baseline body weight.

| <b>Stroke/Systemic Embolism</b> |               |                    |                 |          |
|---------------------------------|---------------|--------------------|-----------------|----------|
|                                 |               | Event rates (%/yr) |                 |          |
|                                 | # of patients | Standard-dose DOAC | Lower-dose DOAC | Warfarin |
| Weight <60kg                    | 6693          | 2.64               | 3.20            | 3.25     |
| Weight 60-120kg                 | 61349         | 1.47               | 1.79            | 1.81     |
| Weight >120kg                   | 3473          | 0.73               | 0.89            | 0.90     |
| <b>Major Bleeding</b>           |               |                    |                 |          |
|                                 |               | Event rates (%/yr) |                 |          |
|                                 | # of patients | Standard-dose DOAC | Lower-dose DOAC | Warfarin |
| Weight <60kg                    | 6672          | 3.51               | 2.71            | 4.08     |
| Weight 60-120kg                 | 61234         | 2.94               | 2.27            | 3.42     |
| Weight >120kg                   | 3465          | 2.67               | 2.06            | 3.10     |

DOAC = Direct Oral Anticoagulant



**Supplement Table 8.** Sample size and event rates (% per year) by categorical baseline creatinine clearance.

| <b>Stroke/Systemic Embolism</b> |               |                    |                 |          |
|---------------------------------|---------------|--------------------|-----------------|----------|
|                                 |               | Event rates (%/yr) |                 |          |
|                                 | # of patients | Standard-dose DOAC | Lower-dose DOAC | Warfarin |
| CrCl ≤50mL/min                  | 13978         | 2.34               | 2.83            | 2.90     |
| CrCl 51-80mL/min                | 31814         | 1.60               | 1.94            | 1.98     |
| CrCl >80mL/min                  | 25679         | 1.05               | 1.27            | 1.29     |
| <b>Major Bleeding</b>           |               |                    |                 |          |
|                                 |               | Event rates (%/yr) |                 |          |
|                                 | # of patients | Standard-dose DOAC | Lower-dose DOAC | Warfarin |
| CrCl ≤50mL/min                  | 13954         | 4.67               | 3.60            | 5.44     |
| CrCl 51-80mL/min                | 31748         | 3.17               | 2.44            | 3.69     |
| CrCl >80mL/min                  | 25630         | 1.96               | 1.51            | 2.28     |

CrCl = Creatinine Clearance; DOAC = Direct Oral Anticoagulant

**Supplement Table 9.** Hazard ratios (95% confidence intervals) and interaction p-values for the primary safety outcome (major bleeding) comparing lower-dose DOAC versus warfarin by categorical baseline covariates. A hazard ratio > 1 favors warfarin over DOAC, whereas a hazard ratio < 1 favors DOAC over warfarin.

|                                |        | Lower-dose DOAC versus warfarin |       |
|--------------------------------|--------|---------------------------------|-------|
| Categorical Baseline Covariate |        | HR (95% CI)                     | P-int |
| Sex                            | Female | 0.60 (0.42-0.85)                | 0.43  |
|                                | Male   | 0.65 (0.46-0.91)                |       |
| Diabetes                       | Yes    | 0.64 (0.45-0.91)                | 0.89  |
|                                | No     | 0.63 (0.45-0.88)                |       |
| Prior stroke/TIA               | Yes    | 0.56 (0.39-0.81)                | 0.17  |
|                                | No     | 0.66 (0.48-0.91)                |       |
| Prior VKA use                  | Yes    | 0.62 (0.45-0.87)                | 0.66  |
|                                | No     | 0.65 (0.46-0.94)                |       |
| Antiplatelet use               | Yes    | 0.65 (0.46-0.92)                | 0.56  |
|                                | No     | 0.62 (0.44-0.86)                |       |
| CHADS <sub>2</sub> Score       | ≥3     | 0.64 (0.44-0.92)                | 0.58  |
|                                | 2      | 0.65 (0.45-0.94)                |       |
|                                | 0, 1   | 0.55 (0.35-0.85)                |       |
| Paroxysmal AF                  | Yes    | 0.63 (0.43-0.90)                | 0.90  |
|                                | No     | 0.64 (0.45-0.89)                |       |
| Coronary artery disease        | Yes    | 0.75 (0.53-1.06)                | 0.01  |
|                                | No     | 0.57 (0.41-0.80)                |       |
| Heart failure                  | Yes    | 0.69 (0.48-1.01)                | 0.09  |
|                                | No     | 0.59 (0.40-0.85)                |       |
| Prior GI bleeding              | Yes    | 0.69 (0.42-1.13)                | 0.18  |
|                                | No     | 0.49 (0.42-0.57)                |       |
| Age (years)                    | >75    | 0.70 (0.49-0.98)                | 0.04  |
|                                | 65-75  | 0.60 (0.42-0.86)                |       |
|                                | <65    | 0.46 (0.29-0.71)                |       |
| Weight (kg)                    | >120   | 0.72 (0.41-1.25)                | 0.42  |
|                                | 60-120 | 0.64 (0.46-0.90)                |       |
|                                | <60    | 0.53 (0.34-0.82)                |       |
| CrCl (mL/min)                  | >80    | 0.56 (0.39-0.82)                | 0.40  |
|                                | 51-80  | 0.67 (0.48-0.94)                |       |
|                                | ≤50    | 0.62 (0.43-0.89)                |       |

AF = atrial fibrillation, CrCl = creatinine clearance, GI = gastrointestinal, TIA = transient ischemic attack

**Supplement Figure 1.** Network graph for the primary analyses and the sensitivity analyses.

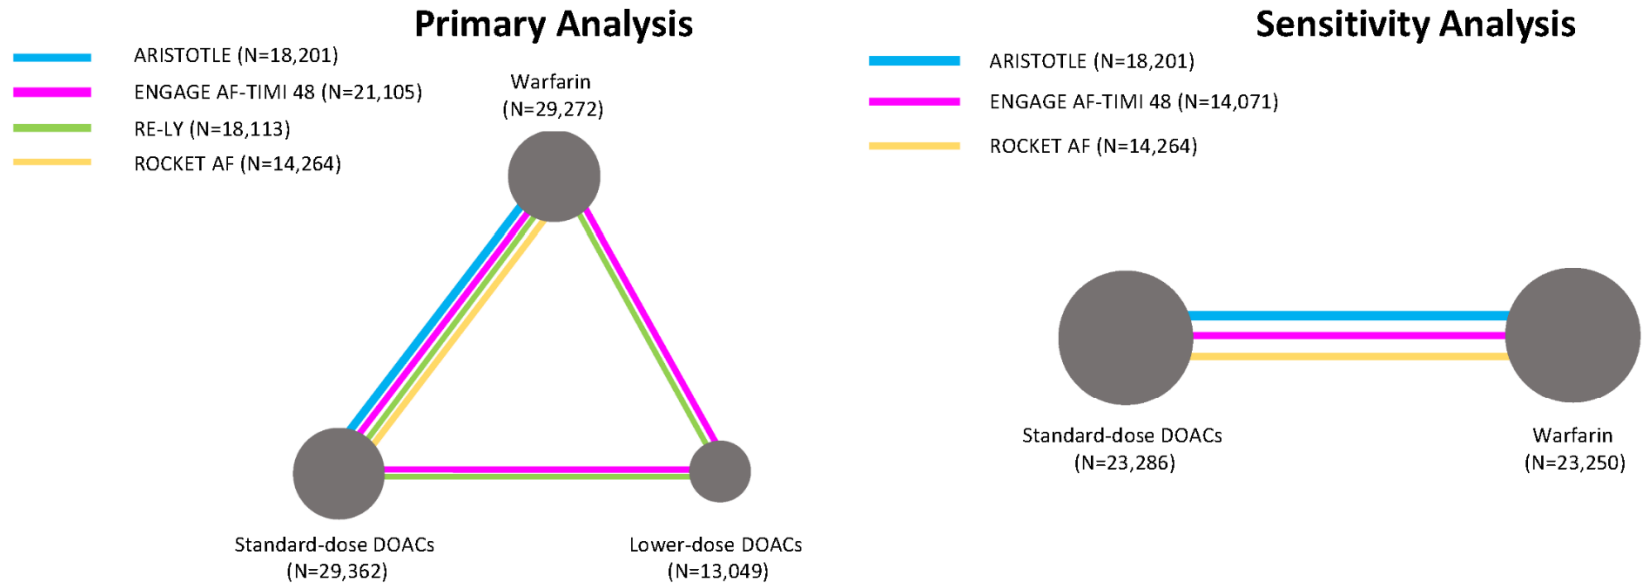

Footnote: Nodes represent anticoagulation treatment strategies and edges represent trials used for comparison of treatment strategies. Node size is proportional to the number of patients randomized to each treatment strategy. Edge thickness is proportional to the sample size from each individual trial.

**Supplement Figure 2.** Hazard ratios for the primary efficacy (top) and safety (bottom) outcomes plotted over the range of baseline age with stratification by sex. Hazard ratio > 1 favors warfarin over DOAC, whereas a hazard ratio < 1 favors DOAC over warfarin.

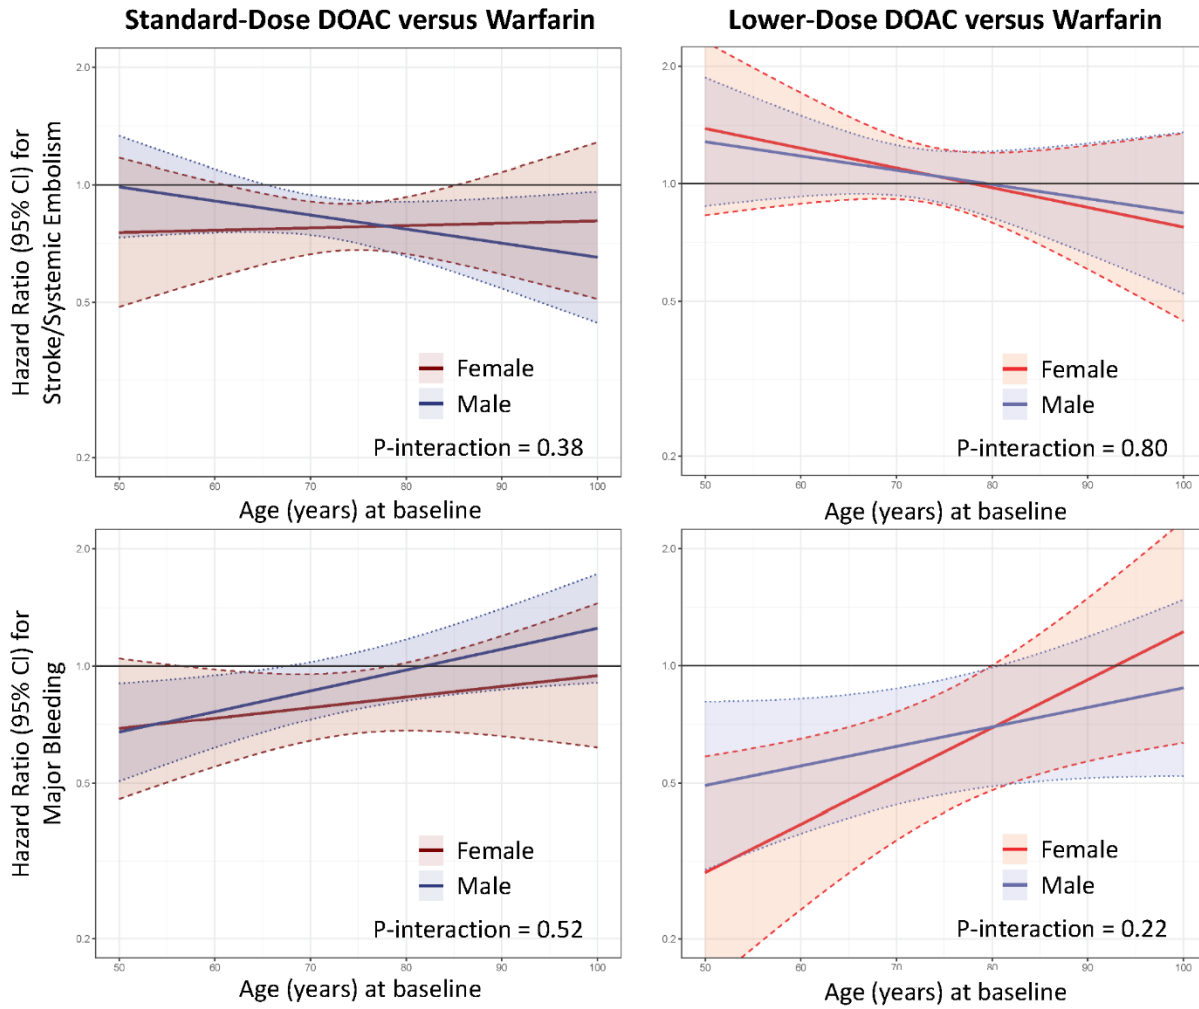

Footnote: X-axis truncated to include 5<sup>th</sup> and 95<sup>th</sup> percentiles.

**Supplement Figure 3.** Forest plots showing hazard ratios and interaction p-values for the sensitivity analyses (including factor Xa inhibitors only in the standard-dose DOAC treatment strategy groups), with efficacy outcomes (left) and safety outcomes (right).

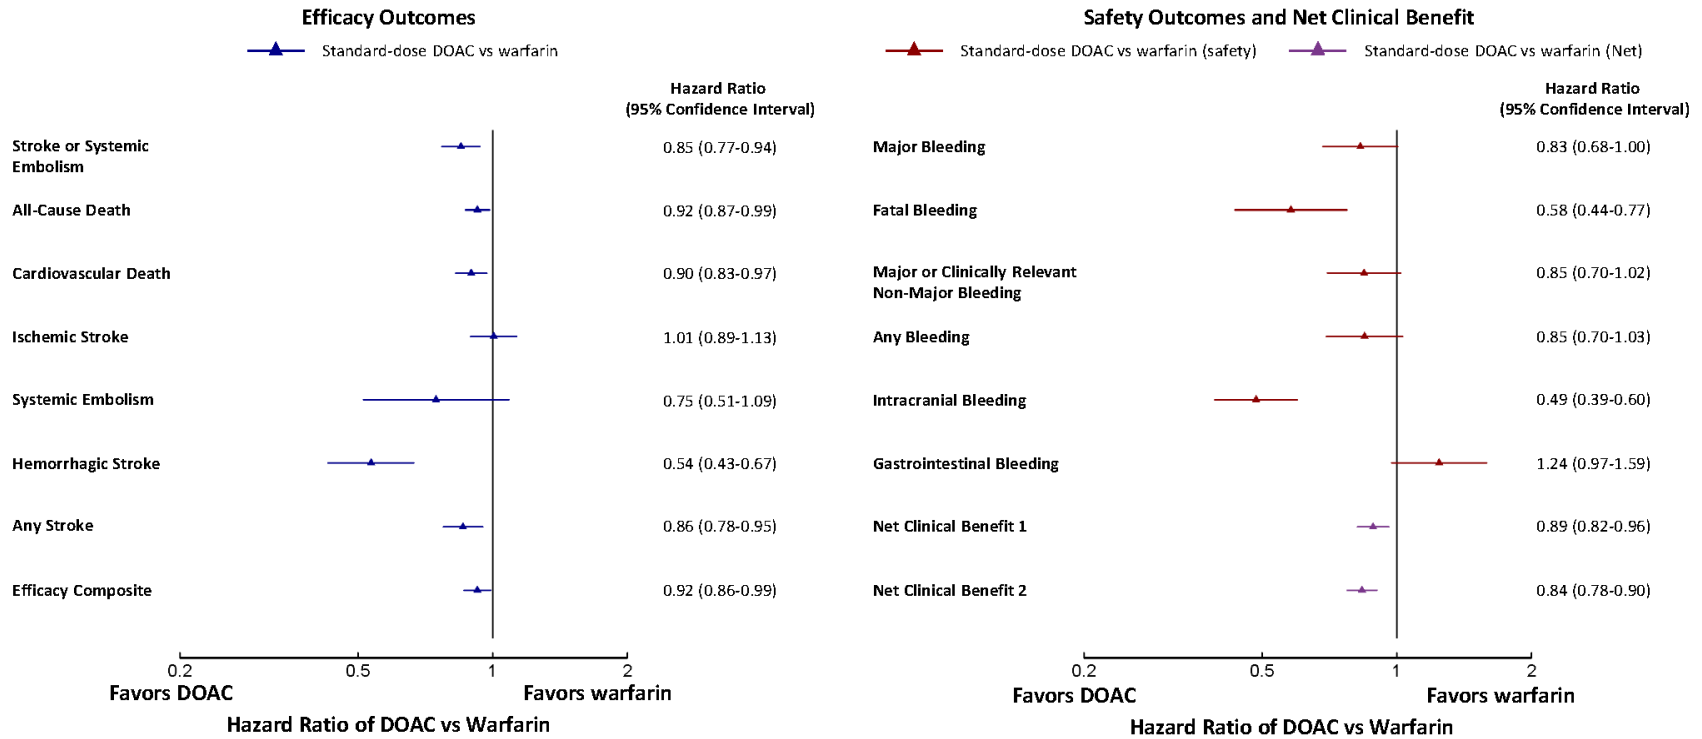

Supplement: NIHMS1764416-supplement-Supplemental_Publication_Material.pdf [file NIHMS1764416-supplement-Supplemental_Publication_Material.pdf]
